# Supplementary material for: Development of Naringin Extract from Pomelo Peel Using Natural Deep Eutectic Solvent System as Green Technology for Antidiabetic Purpose: Box-Behnken design approach
Source: Research Square preprint supplement (doi:10.21203/rs.3.rs-6892292/v1), 2025-06-23
Supplement: Supplementary file 1 [file 6034a3c574b76cae3ac1b423.docx]

**Table 1** Sources of pomelo obtained from local farm in Thailand (3 batches)

| Source | Varieties | Location | Latitude and longitude |
| --- | --- | --- | --- |
| 1 | Khao Hom (KH) |  |  |
| 2 | Khao Nam Pung (KN) | Nakhon Pathom, Thailand | 13.796221889370669, 100.19049325204539 |
| 3 | Khao Pan (KP) | Chai Nat, Thailand | 15.167303312053464, 100.0657046417467 |
| 4 | Khao Tang Kwa (KT) | Nakhon Si Thammarat, Thailand | 8.356292033870233, 100.09533443329155 |
| 5 | Khao Thong Dee (KD) | Samut Songkhram, Thailand | 13.43227602580932, 99.93222629700603 |
| 6 | Khao Yai (KY) | Sukhothai, Thailand | 16.304650911407148, 100.3111915057469 |

**Table** 2 Sources of Thong Dee variety pomelo from different local farms

| Source | Location | Latitude and longitude |
| --- | --- | --- |
| 1 | Nakhon Pathom, Thailand | 13.796221889370669, 100.19049325204539 |
| 2 | Nakhon Si Thammarat, Thailand | 8.356292033870233, 100.09533443329155 |
| 3 | Pathum Thani, Thailand | 14.032166363535282, 100.52662929627817 |

**Table** 3 Composition and molar ratios of DES used for extraction.

| Hydrogen bonding acceptor | Hydrogen bonding donor | Molar ratio |
| --- | --- | --- |
| Choline chloride | Citric acid | 1:1 |
| Choline chloride | Oxalic acid | 1:1 |
| Choline chloride | Malic acid | 1:1 |

**Table 4** Preparation of pomelo peel extracts based on Box-Behnken Design

| Run | Malic acid (HBD)* | Citric acid (HBD) | Powder to solvent ratio |
| --- | --- | --- | --- |
| 1 | 1 | 1 | 1:15 |
| 2 | 3 | 1 | 1:15 |
| 3 | 1 | 3 | 1:15 |
| 4 | 3 | 3 | 1:15 |
| 5 | 1 | 2 | 1:10 |
| 6 | 3 | 2 | 1:10 |
| 7 | 1 | 2 | 1:20 |
| 8 | 3 | 2 | 1:20 |
| 9 | 2 | 1 | 1:10 |
| 10 | 2 | 3 | 1:10 |
| 11 | 2 | 1 | 1:20 |
| 12 | 2 | 3 | 1:20 |
| 13 | 2 | 2 | 1:15 |
| 14 | 2 | 2 | 1:15 |
| 15 | 2 | 2 | 1:15 |
